# Supplementary material for: Exploratory Biomarker Analysis Using Plasma Angiogenesis-Related Factors and Cell-Free DNA in the TRUSTY Study: A Randomized, Phase II/III Study of Trifluridine/Tipiracil Plus Bevacizumab as Second-Line Treatment for Metastatic Colorectal Cancer
Source: PubMed Central journal article supplement — Target Oncol. 2024 Jan 9;19(1):59–69. doi: 10.1007/s11523-023-01027-8 (PMC10830797; doi:10.1007/s11523-023-01027-8), 2024-01-09
Supplement: 11523_2023_1027_MOESM1_ESM.pdf [file 11523_2023_1027_MOESM1_ESM.pdf]

**Title:**

Exploratory Biomarker Analysis Using Plasma Angiogenesis-Related Factors and Cell-Free DNA in the TRUSTY Study: A Randomized Phase II/III Study of Trifluridine/Tipiracil Plus Bevacizumab as Second-Line Treatment for Metastatic Colorectal Cancer

**Running title: TRUSTY: Exploratory biomarker analysis using plasma angiogenesis-related factors and cfDNA**

**Authors:**

Yu Sunakawa<sup>a</sup>, Yasutoshi Kuboki<sup>b</sup>, Jun Watanabe<sup>c</sup>, Tetsuji Terazawa<sup>d</sup>, Hisato Kawakami<sup>e</sup>, Mitsuru Yokota<sup>f</sup>, Masato Nakamura<sup>g</sup>, Masahito Kotaka<sup>h</sup>, Naotoshi Sugimoto<sup>i</sup>, Hitoshi Ojima<sup>j</sup>, Eiji Oki<sup>k</sup>, Takeshi Kajiwara<sup>l</sup>, Yoshiyuki Yamamoto<sup>m</sup>, Yasushi Tsuji<sup>n</sup>, Tadamichi Denda<sup>o</sup>, Takao Tamura<sup>p</sup>, Soichiro Ishihara<sup>q</sup>, Hiroya Taniguchi<sup>r</sup>, Takako Eguchi Nakajima<sup>s</sup>, Satoshi Morita<sup>t</sup>, Kuniaki Shirao<sup>u</sup>, Naruhito Takenaka<sup>v</sup>, Daisuke Ozawa<sup>v</sup>, Takayuki Yoshino<sup>w</sup>

**Affiliations:**

<sup>a</sup>Department of Clinical Oncology, St. Marianna University School of Medicine, Kawasaki, Japan; <sup>b</sup>Department of Experimental Therapeutics, National Cancer Center Hospital East, Kashiwa, Japan; <sup>c</sup>Department of Surgery, Gastroenterological Center, Yokohama City University Medical Center, Yokohama, Japan; <sup>d</sup>Cancer Chemotherapy Center, Osaka Medical and Pharmaceutical University, Takatsuki, Japan; <sup>e</sup>Department of Medical Oncology, Kindai University Faculty of Medicine Hospital, Osaka-Sayama, Japan; <sup>f</sup>Department of General Surgery, Kurashiki Central Hospital, Kurashiki, Japan; <sup>g</sup>Aizawa Comprehensive Cancer Center, Aizawa Hospital, Matsumoto, Japan; <sup>h</sup>Gastrointestinal Cancer Center, Sano Hospital, Kobe,

Japan; <sup>i</sup>Department of Genetic Oncology, Osaka International Cancer Institute, Osaka, Japan; <sup>j</sup>Department of Gastroenterological Surgery, Gunma Prefectural Cancer Center, Ota, Japan; <sup>k</sup>Department of Surgery and Science, Graduate School of Medical Science, Kyushu University, Fukuoka, Japan; <sup>l</sup>Department of Gastrointestinal Medical Oncology, National Hospital Organization Shikoku Cancer Center, Matsuyama, Japan; <sup>m</sup>Department of Gastroenterology, Faculty of Medicine, University of Tsukuba, Tsukuba, Japan; <sup>n</sup>Department of Medical Oncology, Tonan Hospital, Sapporo, Japan; <sup>o</sup>Division of Gastroenterology, Chiba Cancer Center, Chiba, Japan; <sup>p</sup>Department of Medical Oncology, Kindai University Nara Hospital, Ikoma, Japan; <sup>q</sup>Department of Surgical Oncology, The University of Tokyo, Tokyo, Japan; <sup>r</sup>Department of Clinical Oncology, Aichi Cancer Center Hospital, Nagoya, Japan; <sup>s</sup>Department of Early Clinical Development, Kyoto University Graduate School of Medicine, Kyoto, Japan; <sup>t</sup>Department of Biomedical Statistics and Bioinformatics, Graduate School of Medicine, Kyoto University, Kyoto, Japan; <sup>u</sup>Oita University Faculty of Medicine, Yufu, Japan; <sup>v</sup>Clinical Development and Medical Affairs Division, Taiho Pharmaceutical Co., Ltd, Tokyo, Japan; <sup>w</sup>Department of Gastroenterology and Gastrointestinal Oncology, National Cancer Center Hospital East, Kashiwa, Japan

**Corresponding author:**

Yu Sunakawa

Department of Clinical Oncology, St. Marianna University School of Medicine,  
Kawasaki, Kanagawa, Japan

2-16-1 Sugao, Miyamae-ku, Kawasaki, Kanagawa 216-8511, Japan

Telephone number: 81-44-977-8111

Email: [y.sunakawa@marianna-u.ac.jp](mailto:y.sunakawa@marianna-u.ac.jp)

ORCID: <https://orcid.org/0000-0002-0163-7543>

## **Supplementary Material**

### **Supplementary Figure legends**

**Supplementary Figure S1. PFS in the biomarker analysis set in the FTD/TPI plus bevacizumab group.**

BEV, bevacizumab; CI, confidence interval; FTD/TPI, trifluridine/tipiracil; PFS, progression-free survival

**Supplementary Figure S2. Kaplan-Meier curves for PFS in the FTD/TPI plus bevacizumab group: A. Angiopoietin-2; B. HGF; C. IFN- $\gamma$ ; D. IL-6; E. IL-8; F. PIGF.**

CI, confidence interval; FTD/TPI, trifluridine/tipiracil; HGF, hepatocyte growth factor, HR, hazard ratio; IFN- $\gamma$ , interferon gamma; IL, interleukin; PFS, progression-free survival; PIGF, placental growth factor

**Supplementary Figure S3. Kaplan-Meier curves for PFS in the FTD/TPI plus bevacizumab group: A. VEGF-A; B. VEGF-D; C. OPN; D. sNeuropilin-1; E. sVEGFR-1; F. sVEGFR-2.**

CI, confidence interval; FTD/TPI, trifluridine/tipiracil; HR, hazard ratio; PFS, progression-free survival; OPN, osteopontin; sNeuropilin-1, soluble neuropilin 1; sVEGFR, soluble vascular endothelial growth factor receptor; VEGF, vascular endothelial growth factor

**Supplementary Figure S4. Kaplan-Meier curves for PFS in the FTD/TPI plus bevacizumab group: A. sVEGFR-3; B. TSP-2; C. sICAM-1; D. sVCAM-1; E. TIMP-1; F. cfDNA.**

cfDNA, cell-free deoxyribonucleic acid; CI, confidence interval; FTD/TPI, trifluridine/tipiracil; HR, hazard ratio; NE, not estimable; PFS, progression-free survival; sICAM-1, soluble intercellular adhesion molecule-1; sVCAM-1, soluble

vascular cell adhesion molecule-1; sVEGFR, soluble vascular endothelial growth factor receptor; TIMP-1, tissue inhibitor of metalloproteinase-1; TSP-2, thrombospondin-2

**Supplementary Figure S5. Clinical outcomes according to baseline concentrations of angiogenesis-related factors and cfDNA in the control group (fluoropyrimidine plus irinotecan plus bevacizumab): A. DCR; B. PFS.**

cfDNA, cell-free DNA; CI, confidence interval; DCR, disease control rate; HGF, hepatocyte growth factor; HR, hazard ratio; IFN- $\gamma$ , interferon gamma; IL, interleukin; mPFS, median progression-free survival; NE, not estimable; PFS, progression-free survival; OPN, osteopontin; PIGF, placental growth factor; RR, risk ratio; sICAM-1, soluble intercellular adhesion molecule-1; sNeuropilin-1, soluble neuropilin 1; sVCAM-1, soluble vascular adhesion molecule-1; sVEGFR, soluble vascular endothelial growth factor receptor; TIMP-1, tissue inhibitor of metalloproteinase-1; TSP-2, thrombospondin-2; VEGF, vascular endothelial growth factor

**Supplementary Figure S1. PFS in the biomarker analysis set in the FTD/TPI plus bevacizumab group.**

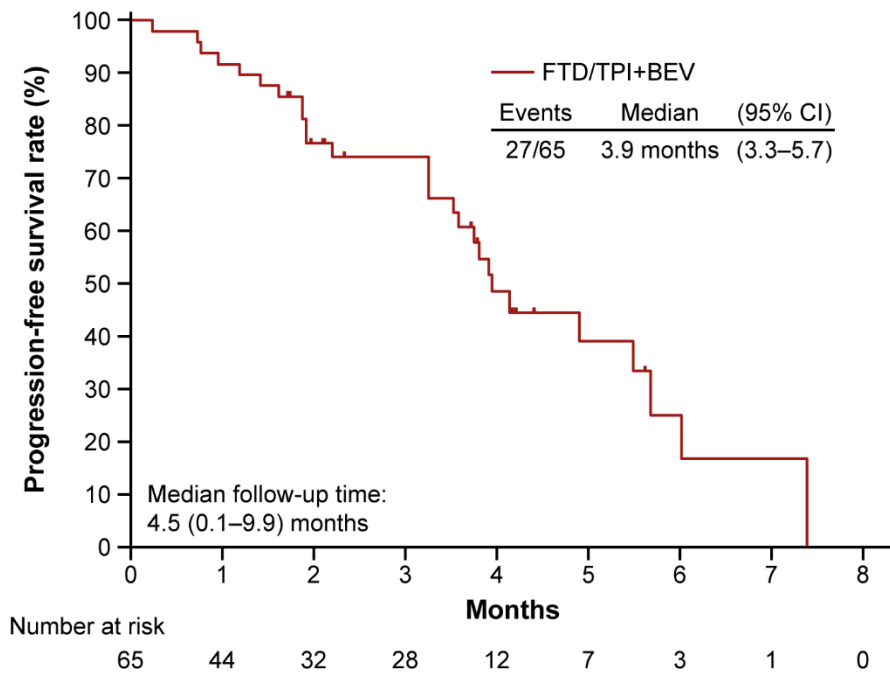

BEV, bevacizumab; CI, confidence interval; FTD/TPI, trifluridine/tipiracil; PFS, progression-free survival

**Supplementary Figure S2. Kaplan-Meier curves for PFS in the FTD/TPI plus bevacizumab group: A. Angiopoietin-2; B. HGF; C. IFN- $\gamma$ ; D. IL-6; E. IL-8; F. PIGF.**

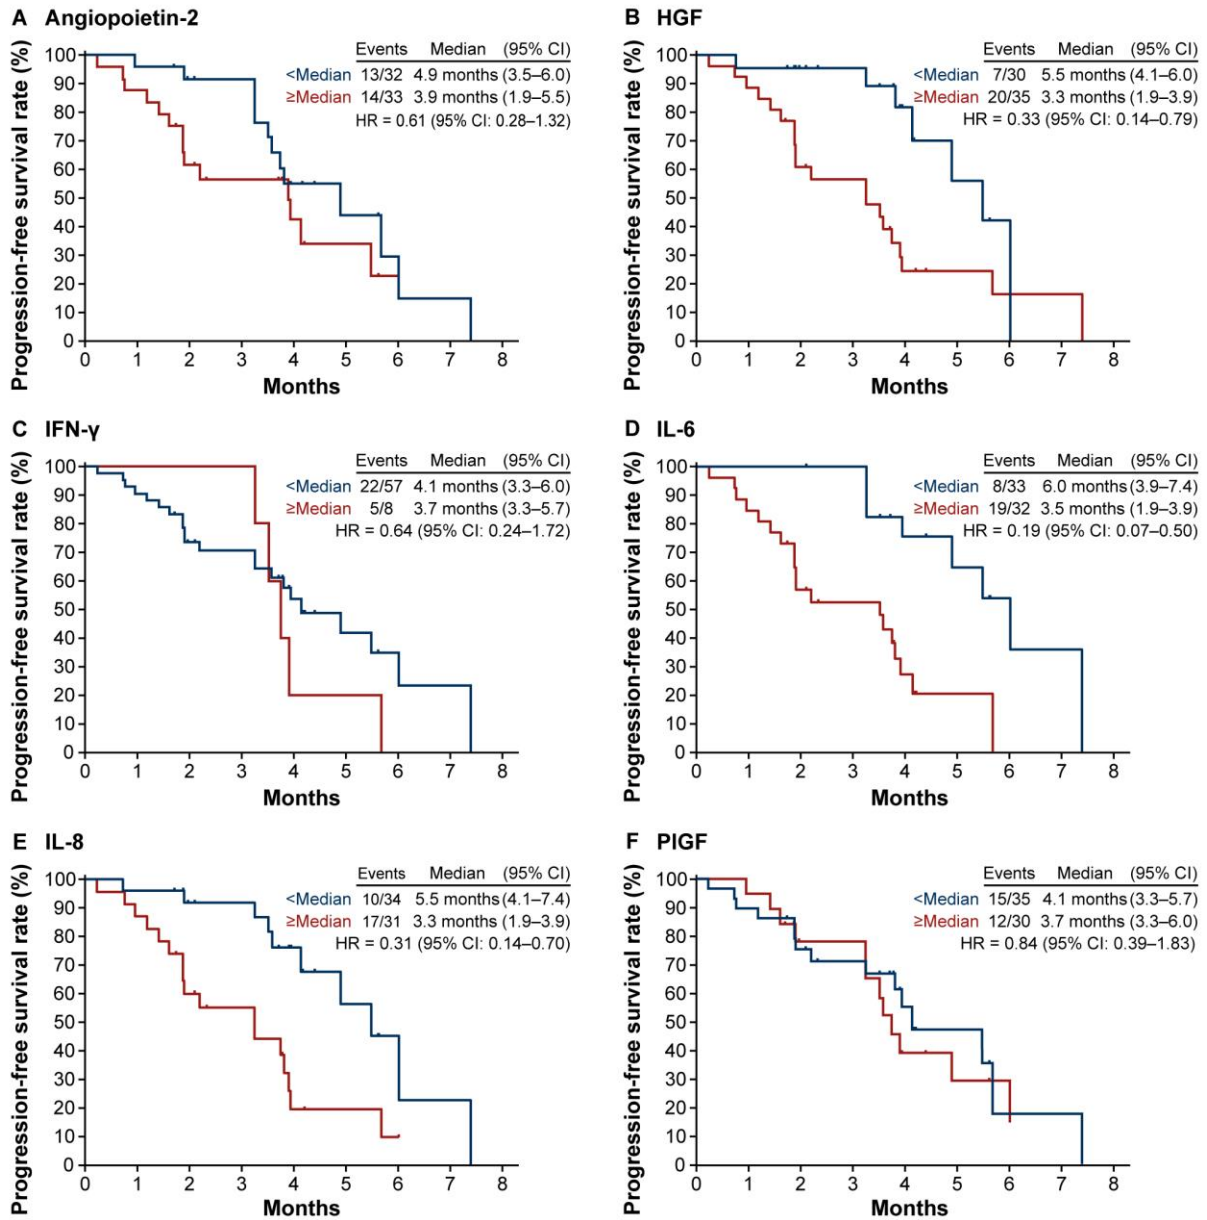

CI, confidence interval; FTD/TPI, trifluridine/tipiracil; HGF, hepatocyte growth factor, HR, hazard ratio; IFN- $\gamma$ , interferon gamma; IL, interleukin; PFS, progression-free survival; PIGF, placental growth factor

**Supplementary Figure S3. Kaplan-Meier curves for PFS in the FTD/TPI plus bevacizumab group: A. VEGF-A; B. VEGF-D; C. OPN; D. sNeuropilin-1; E. sVEGFR-1; F. sVEGFR-2.**

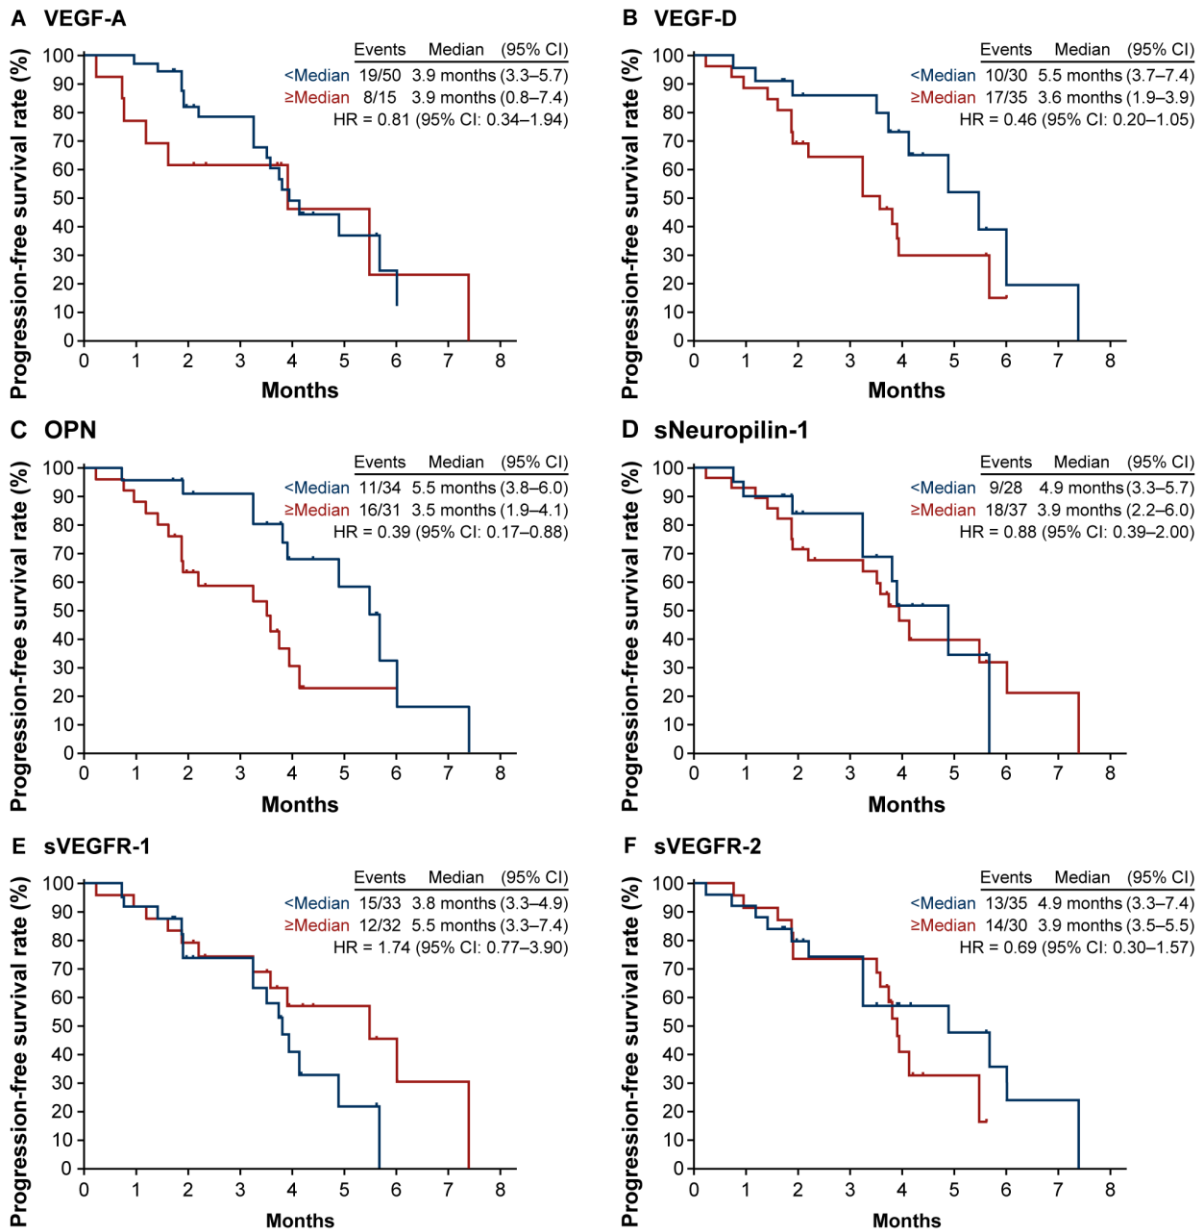

CI, confidence interval; FTD/TPI, trifluridine/tipiracil; HR, hazard ratio; PFS, progression-free survival; OPN, osteopontin; sNeuropilin-1, soluble neuropilin 1; sVEGFR, soluble vascular endothelial growth factor receptor; VEGF, vascular endothelial growth factor



**Supplementary Figure S4. Kaplan-Meier curves for PFS in the FTD/TPI plus bevacizumab group: A. sVEGFR-3; B. TSP-2; C. sICAM-1; D. sVCAM-1; E. TIMP-1; F. cfDNA.**

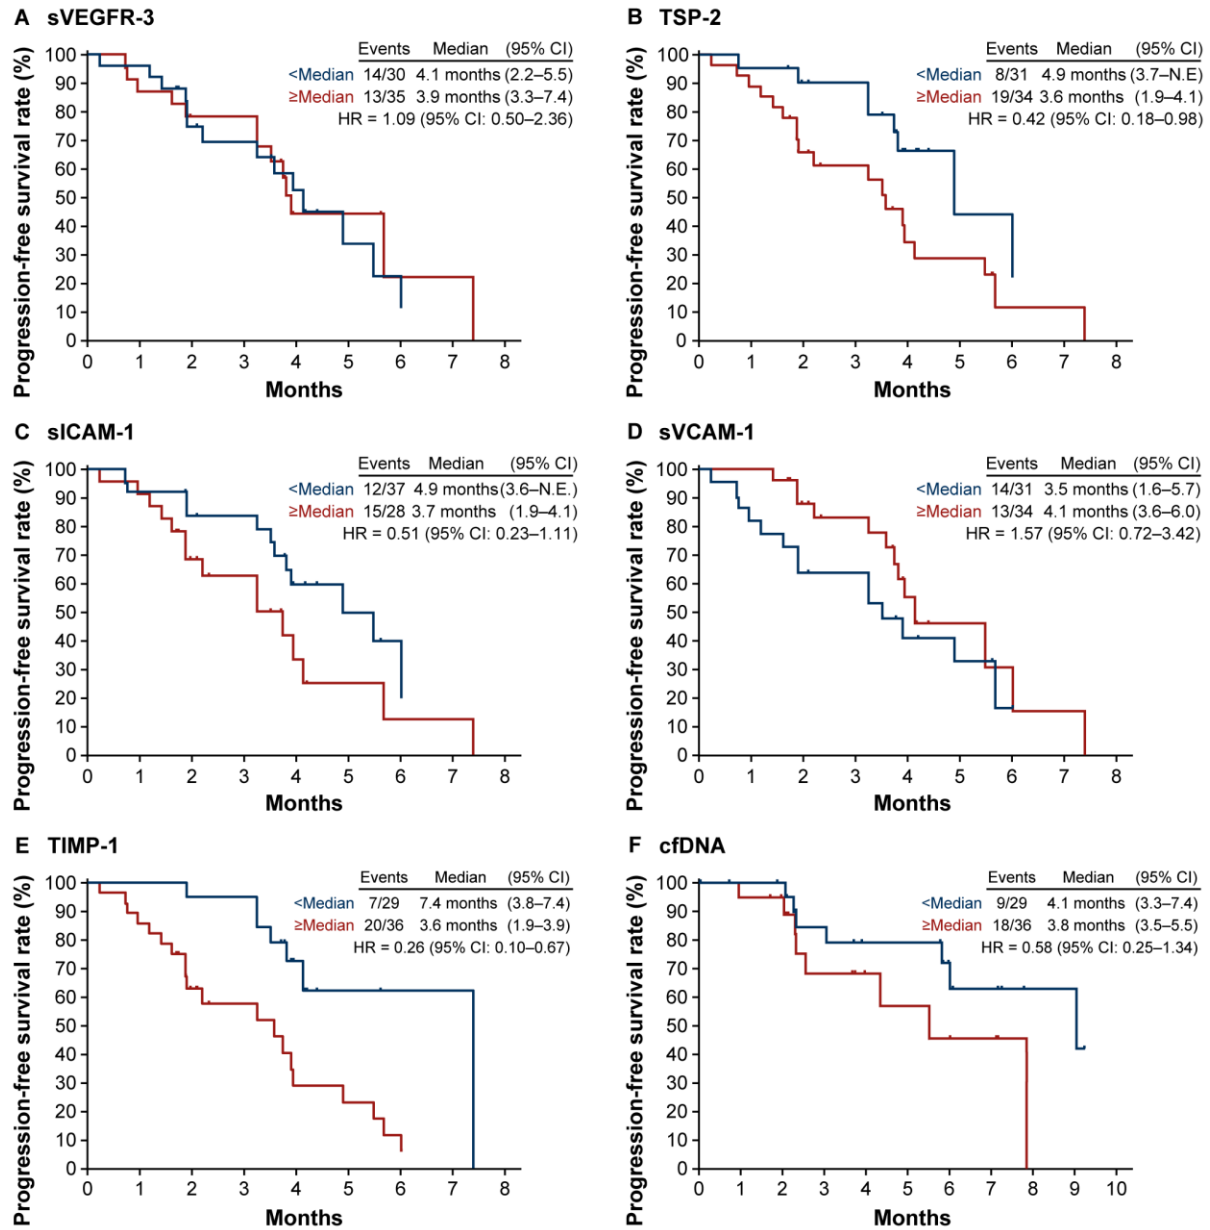

cfDNA, cell-free DNA; CI, confidence interval; FTD/TPI, trifluridine/tipiracil; HR, hazard ratio; NE, not estimable; PFS, progression-free survival; sICAM-1, soluble intercellular adhesion molecule-1; sVCAM-1, soluble vascular cell adhesion

molecule-1; sVEGFR, soluble vascular endothelial growth factor receptor; TIMP-1, tissue inhibitor of metalloproteinase-1; TSP-2, thrombospondin-2

**Supplementary Figure S5. Clinical outcomes according to baseline concentrations of angiogenesis-related factors and cfDNA in the control group (fluoropyrimidine plus irinotecan plus bevacizumab): A. DCR; B. PFS.**

**A**

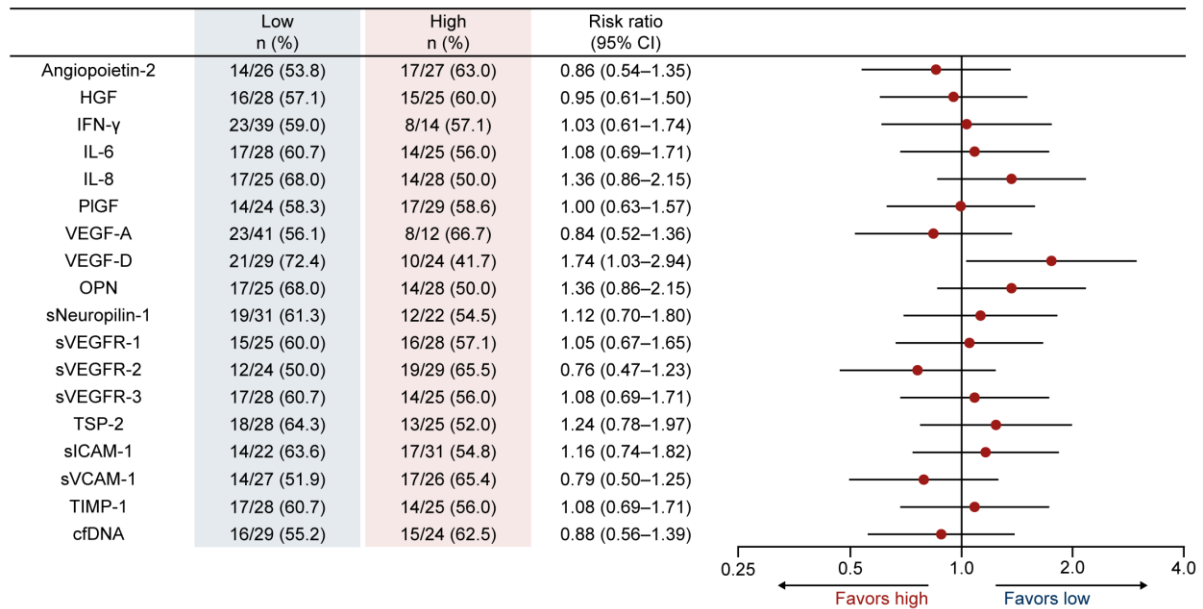

**B**

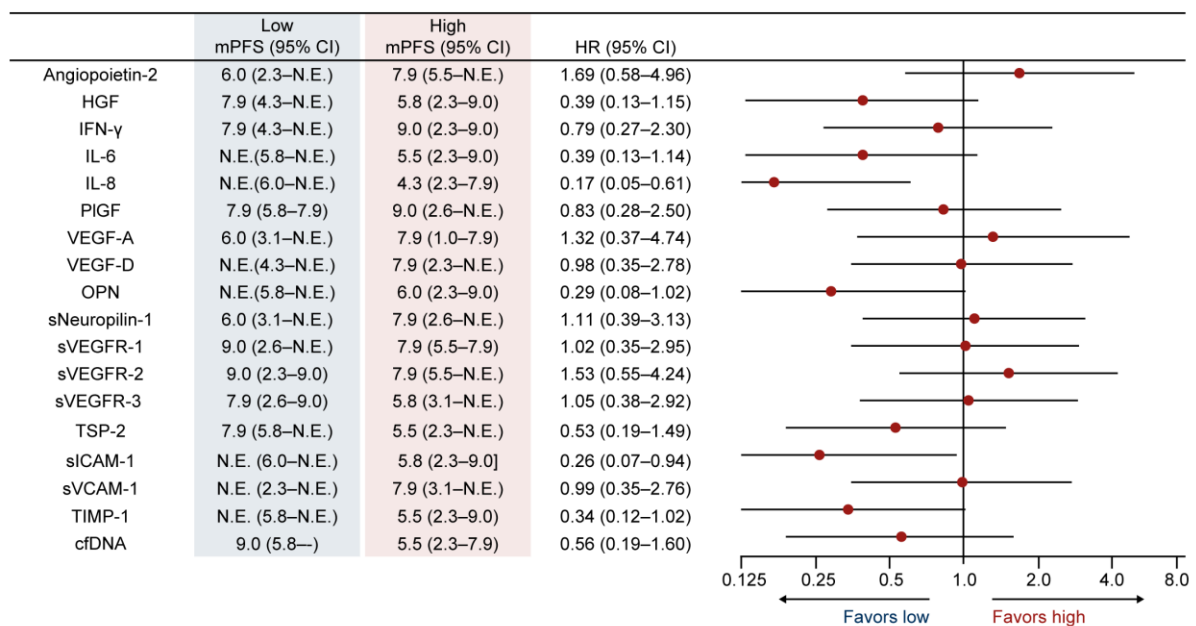

cfDNA, cell-free DNA; CI, confidence interval; DCR, disease control rate; HGF, hepatocyte growth factor; HR, hazard ratio; IFN-γ, interferon gamma; IL, interleukin; mPFS, median progression-free survival; NE, not estimable; PFS, progression-free

survival; OPN, osteopontin; PlGF, placental growth factor; sICAM-1, soluble intercellular adhesion molecule-1; sNeuropilin-1, soluble neuropilin 1; sVCAM-1, soluble vascular adhesion molecule-1; sVEGFR, soluble vascular endothelial growth factor receptor; TIMP-1, tissue inhibitor of metalloproteinase-1; TSP-2, thrombospondin-2; VEGF, vascular endothelial growth factor

**Supplementary Table S1. Plasma concentrations of angiogenesis-related factors and cfDNA at baseline in the biomarker analysis set**

|                    | <b>Median (ng/mL)</b> | <b>Range</b>      |
|--------------------|-----------------------|-------------------|
| Angiopoietin-2     | 1,025.0               | 37–4,100          |
| HGF                | 170.0                 | 60–898            |
| IFN- $\gamma$      | 2.0                   | 2.0–887           |
| IL-6               | 2.0                   | 2.0–120           |
| IL-8               | 7.95                  | 2.0–187           |
| PlGF               | 17.55                 | 3.0–75.7          |
| VEGF-A             | 30.0                  | 30–1170           |
| VEGF-D             | 433.0                 | 60–2,760          |
| OPN                | 17,600.0              | 855–95,700        |
| sNeuropilin-1      | 335,500.0             | 140,000–1,000,000 |
| sVEGFR-1           | 147.5                 | 50–950            |
| sVEGFR-2           | 9,285.0               | 3,330–21,300      |
| sVEGFR-3           | 4,440.0               | 1,500–25,500      |
| TSP-2              | 7,375.0               | 500–127,000       |
| sICAM-1            | 369,500.0             | 104,000–2,130,000 |
| sVCAM-1            | 908,000.0             | 487,000–2,210,000 |
| TIMP-1             | 261,000.0             | 135,000–2,090,000 |
| cfDNA <sup>a</sup> | 0.8631                | 0.090–20.535      |

<sup>a</sup>Concentration is mg/L

cfDNA, cell-free DNA; FTD/TPI, trifluridine/tipiracil; HGF, hepatocyte growth factor; IFN- $\gamma$ , interferon gamma; IL, interleukin; OPN, osteopontin; PlGF, placental growth

factor; sICAM-1, soluble intercellular adhesion molecule-1; sNeuropilin-1, soluble neuropilin 1; sVCAM-1, soluble vascular adhesion molecule-1; sVEGFR, soluble vascular endothelial growth factor receptor; TIMP-1, tissue inhibitor of metalloproteinase-1; TSP-1, thrombospondin-2; VEGF, vascular endothelial growth factor

**Supplementary Table S2. Best overall response in the biomarker analysis set**

| <b>FTD/TPI plus BEV</b><br><b>(<i>n</i> = 65)</b> | <b><i>n</i> (%)</b> |
|---------------------------------------------------|---------------------|
| CR                                                | 0 (0.0)             |
| PR                                                | 2 (3.1)             |
| SD                                                | 34 (52.3)           |
| PD                                                | 10 (15.4)           |
| NE                                                | 19 (29.2)           |
| Response rate (CR + PR)                           | 2 (3.1)             |
| 95% CI                                            | 0.4–10.7            |
| DCR                                               | 36 (55.4)           |
| 95% CI                                            | 42.5–67.7           |

BEV, bevacizumab; CI, confidence interval; CR, complete response; DCR, disease control rate; FTD/TPI, trifluridine/tipiracil; NE, not estimable; PD, progressive disease; PR, partial response; SD, stable disease
